# Supplementary material
Source: publisher site journal article supplement (https://www.dovepress.com/article/supplementary_file/604162/604162_Supporting%20Information.docx)
Supplement: Supplementary file 1 [file 604162_Supporting%20Information.docx]

**A Brain-Targeted Organophosphorus Hydrolase Fusion Protein Mediated by Angiopep-2 Neutralizes Central Organophosphates and Alleviates Neurotoxicity**

Yanwei Xie1, Jiaxuan Shang1, Ming Ma1, Dan Wang1, Shengye Xu1, Yuhua Ran1 2, Zhiping Li1 2, Yanan Zhai 1 2*, Xiang Gao1 2 *, Jing Gao1 2*

*Corresponding authors.

*Email addresses*: [zyn1989@mail.ustc.edu.cn](mailto:zyn1989@mail.ustc.edu.cn) (Y. Zhai); gaoxiang609@126.com (X. Gao); gjsmmu@126.com (J. Gao).

**This word file includes:**

**Methods**

**Fig.S1. Schematic maps of recombinant pET28a expression plasmids encoding ANG-OPHDS5 fusion proteins with different domain arrangements and tag configurations.**

**Fig.S2. Amino acid sequence coverage map of ANG-OPHDS5 from qualitative proteomics analysis using HPLC-MS/MS.**

**Fig.S3. Secondary‑structure composition of OPHDS5 and ANG‑OPHDS5.**

**Table S1. The coding gene sequences encoding six distinct fusion proteins.**

**Table S2. Animal Poisoning Symptom Score.**

**Methods**

**Amino acid sequencing by HPLC-MS**

The SDS-PAGE gel bands were excised and transferred to 2.0 mL grinding tubes. Two 2.2 mm steel beads and gel destaining solution were added, followed by incubation with shaking at 60°C. The destaining solution was replaced repeatedly until the gel pieces became transparent and colorless. Fifty microliters of digestion buffer were added to submerge the gel pieces, which were then homogenized using a tissue homogenizer (60 Hz, 30 s). The homogenate was centrifuged at 2000 × g for 1 min to pellet the gel material, followed by overnight enzymatic digestion at 37°C.The next day, formic acid was added to terminate the digestion. Acetonitrile was added, and the mixture was vortexed for 10 min. The supernatant was collected. This extraction step was repeated once, and the combined supernatants were lyophilized.

The samples were desalted using C18 desalting columns (QL-C18-C-10, Qinglian Bai'ao Biotechnology Co., Ltd., Beijing). The columns were activated with 100% acetonitrile and equilibrated with 0.1% formic acid. After loading the samples, the columns were washed with 0.1% formic acid to remove impurities. Finally, peptides were eluted with 40% acetonitrile. The eluate was collected and lyophilized.

Mobile phase A (100% water with 0.1% formic acid) and mobile phase B (80% acetonitrile with 0.1% formic acid) were prepared. The lyophilized powder was reconstituted in 10 µL of mobile phase A, centrifuged at 14,000 × g at 4 °C for 20 min, and 1 µg of the supernatant was injected for LC‑MS analysis. The liquid chromatography elution conditions are shown in Table S5. A Q Exactive HF‑X mass spectrometer equipped with a protein analytical column (Cat. No. QL‑HPLC‑100*15) and a Nanospray Flex™ (NSI) ion source was used. The ion spray voltage was set to 2.2 kV and the ion transfer tube temperature to 275 °C. Data‑dependent acquisition (DDA) mode was applied with a full‑scan mass range of *m*/*z* 350–1500. The MS1 resolution was set to 120,000 (at *m*/*z* 200) with an AGC target of 3 × 10⁶ and a maximum injection time of 80 ms. The top 40 most intense precursor ions were selected for HCD fragmentation, and MS2 spectra were acquired at a resolution of 15,000 (at *m*/*z* 200) with an AGC target of 5 × 10⁴, a maximum injection time of 45 ms, and a normalized collision energy of 27%. The raw data were searched against a custom database containing the target protein sequences using Proteome Discoverer software (version 2.4).


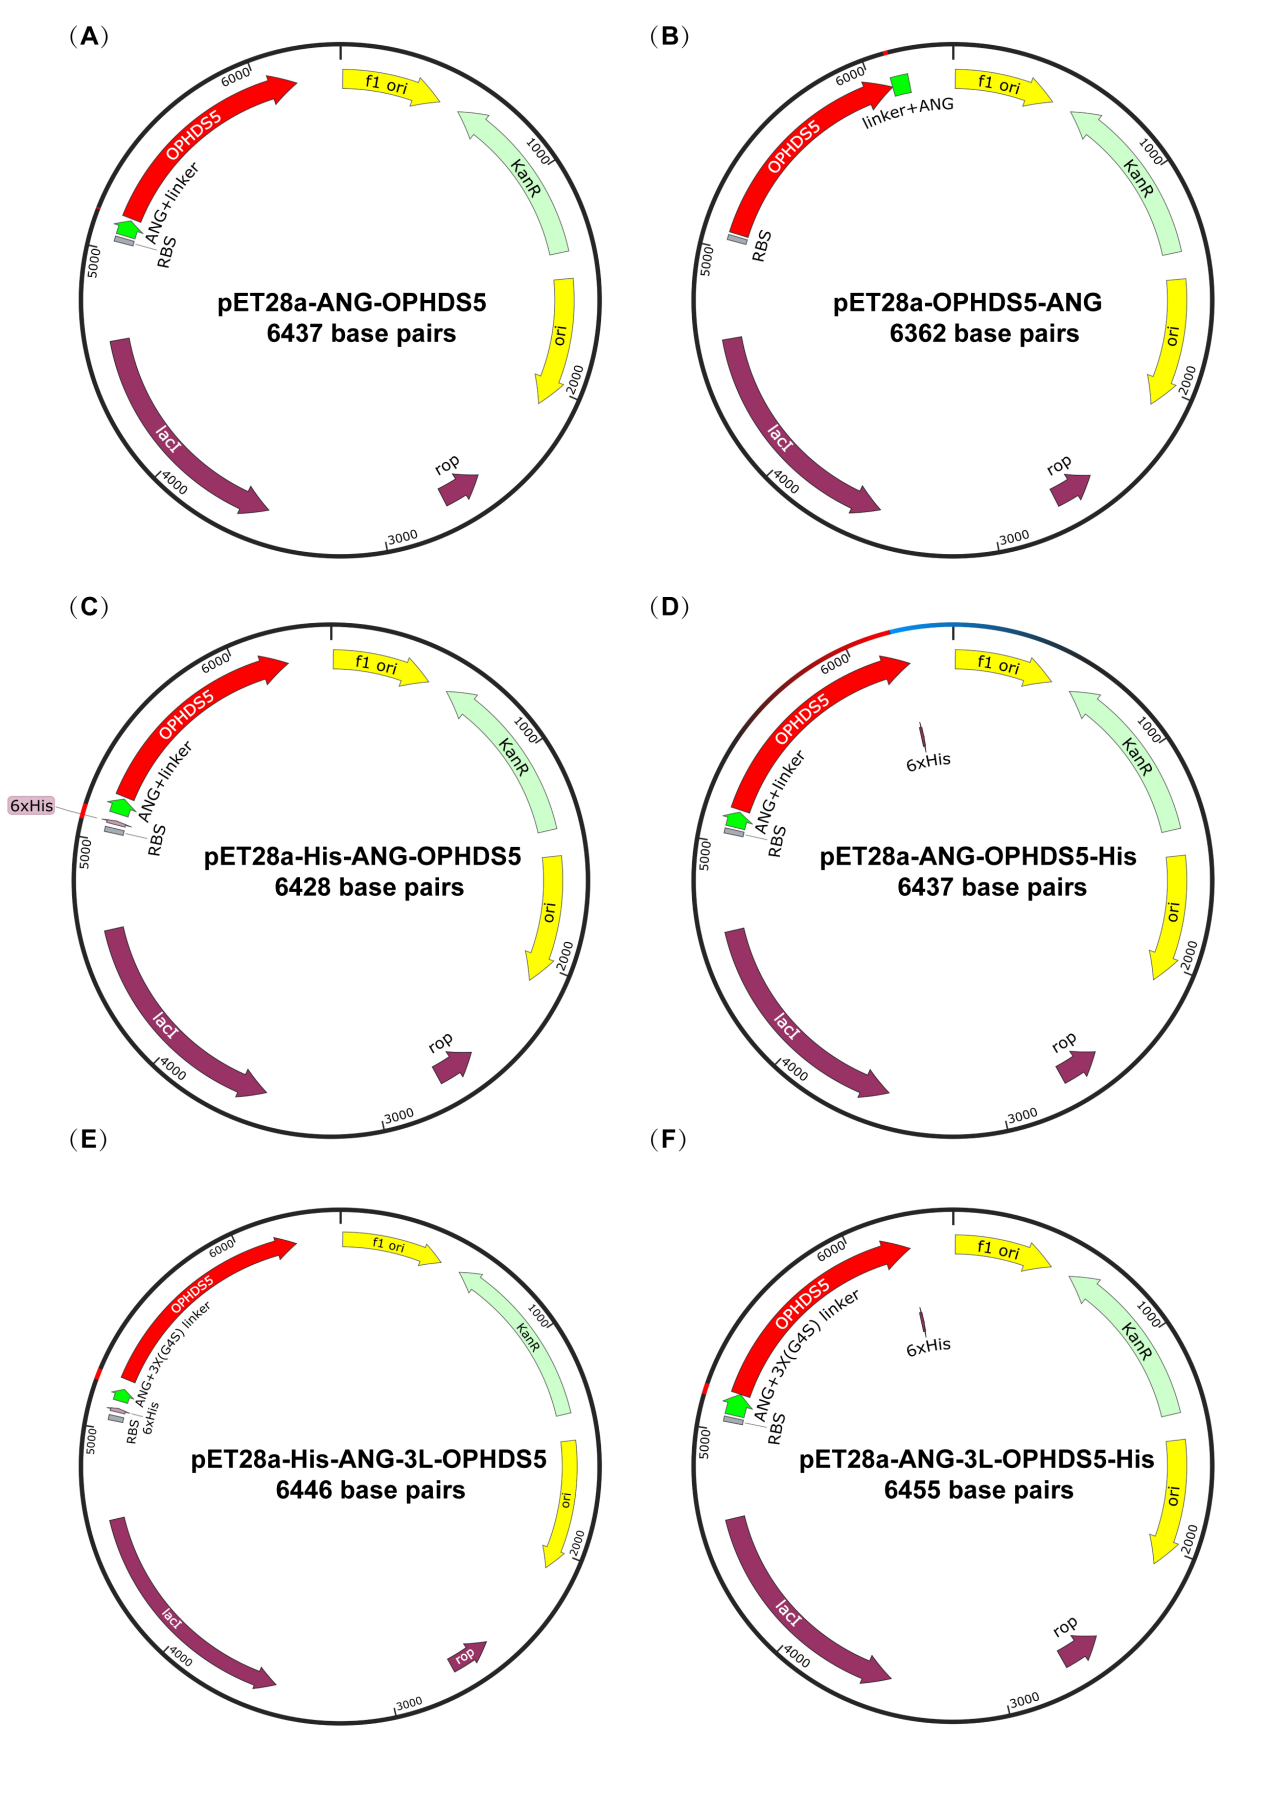


**Fig.S1. Schematic maps of recombinant pET28a expression plasmids encoding ANG-OPHDS5 fusion proteins with different domain arrangements and tag configurations.** (A)pET28a-ANG-OPHDS5 (6437 bp): The ANG peptide (green) is fused to the N-terminus of OPHDS5 (red) via a short linker sequence (gray), with no additional tags. (B) pET28a-OPHDS5-ANG (6362 bp): The ANG peptide (green) is fused to the C-terminus of OPHDS5 (red) via a short linker sequence (gray), with no additional tags. (C) pET28a-His-ANG-OPHDS5 (6428 bp): A 6×His tag (gray) is fused to the N-terminus of ANG, which is further linked to the N-terminus of OPHDS5 via a short linker. (D) pET28a-ANG-OPHDS5-His (6437 bp): A 6×His tag (gray) is fused to the C-terminus of OPHDS5, with ANG at the N-terminus of the fusion protein. (E) pET28a-His-ANG-3L-OPHDS5 (6446 bp): A 6×His tag (gray) is fused to the N-terminus of ANG, which is linked to OPHDS5 via a 3×(G4S) flexible linker (ANG-3×(G4S) linker). (F) pET28a-ANG-3L-OPHDS5-His (6455 bp): ANG is linked to OPHDS5 via a 3×(G4S) flexible linker at the N-terminus, with a 6×His tag fused to the C-terminus of OPHDS5.


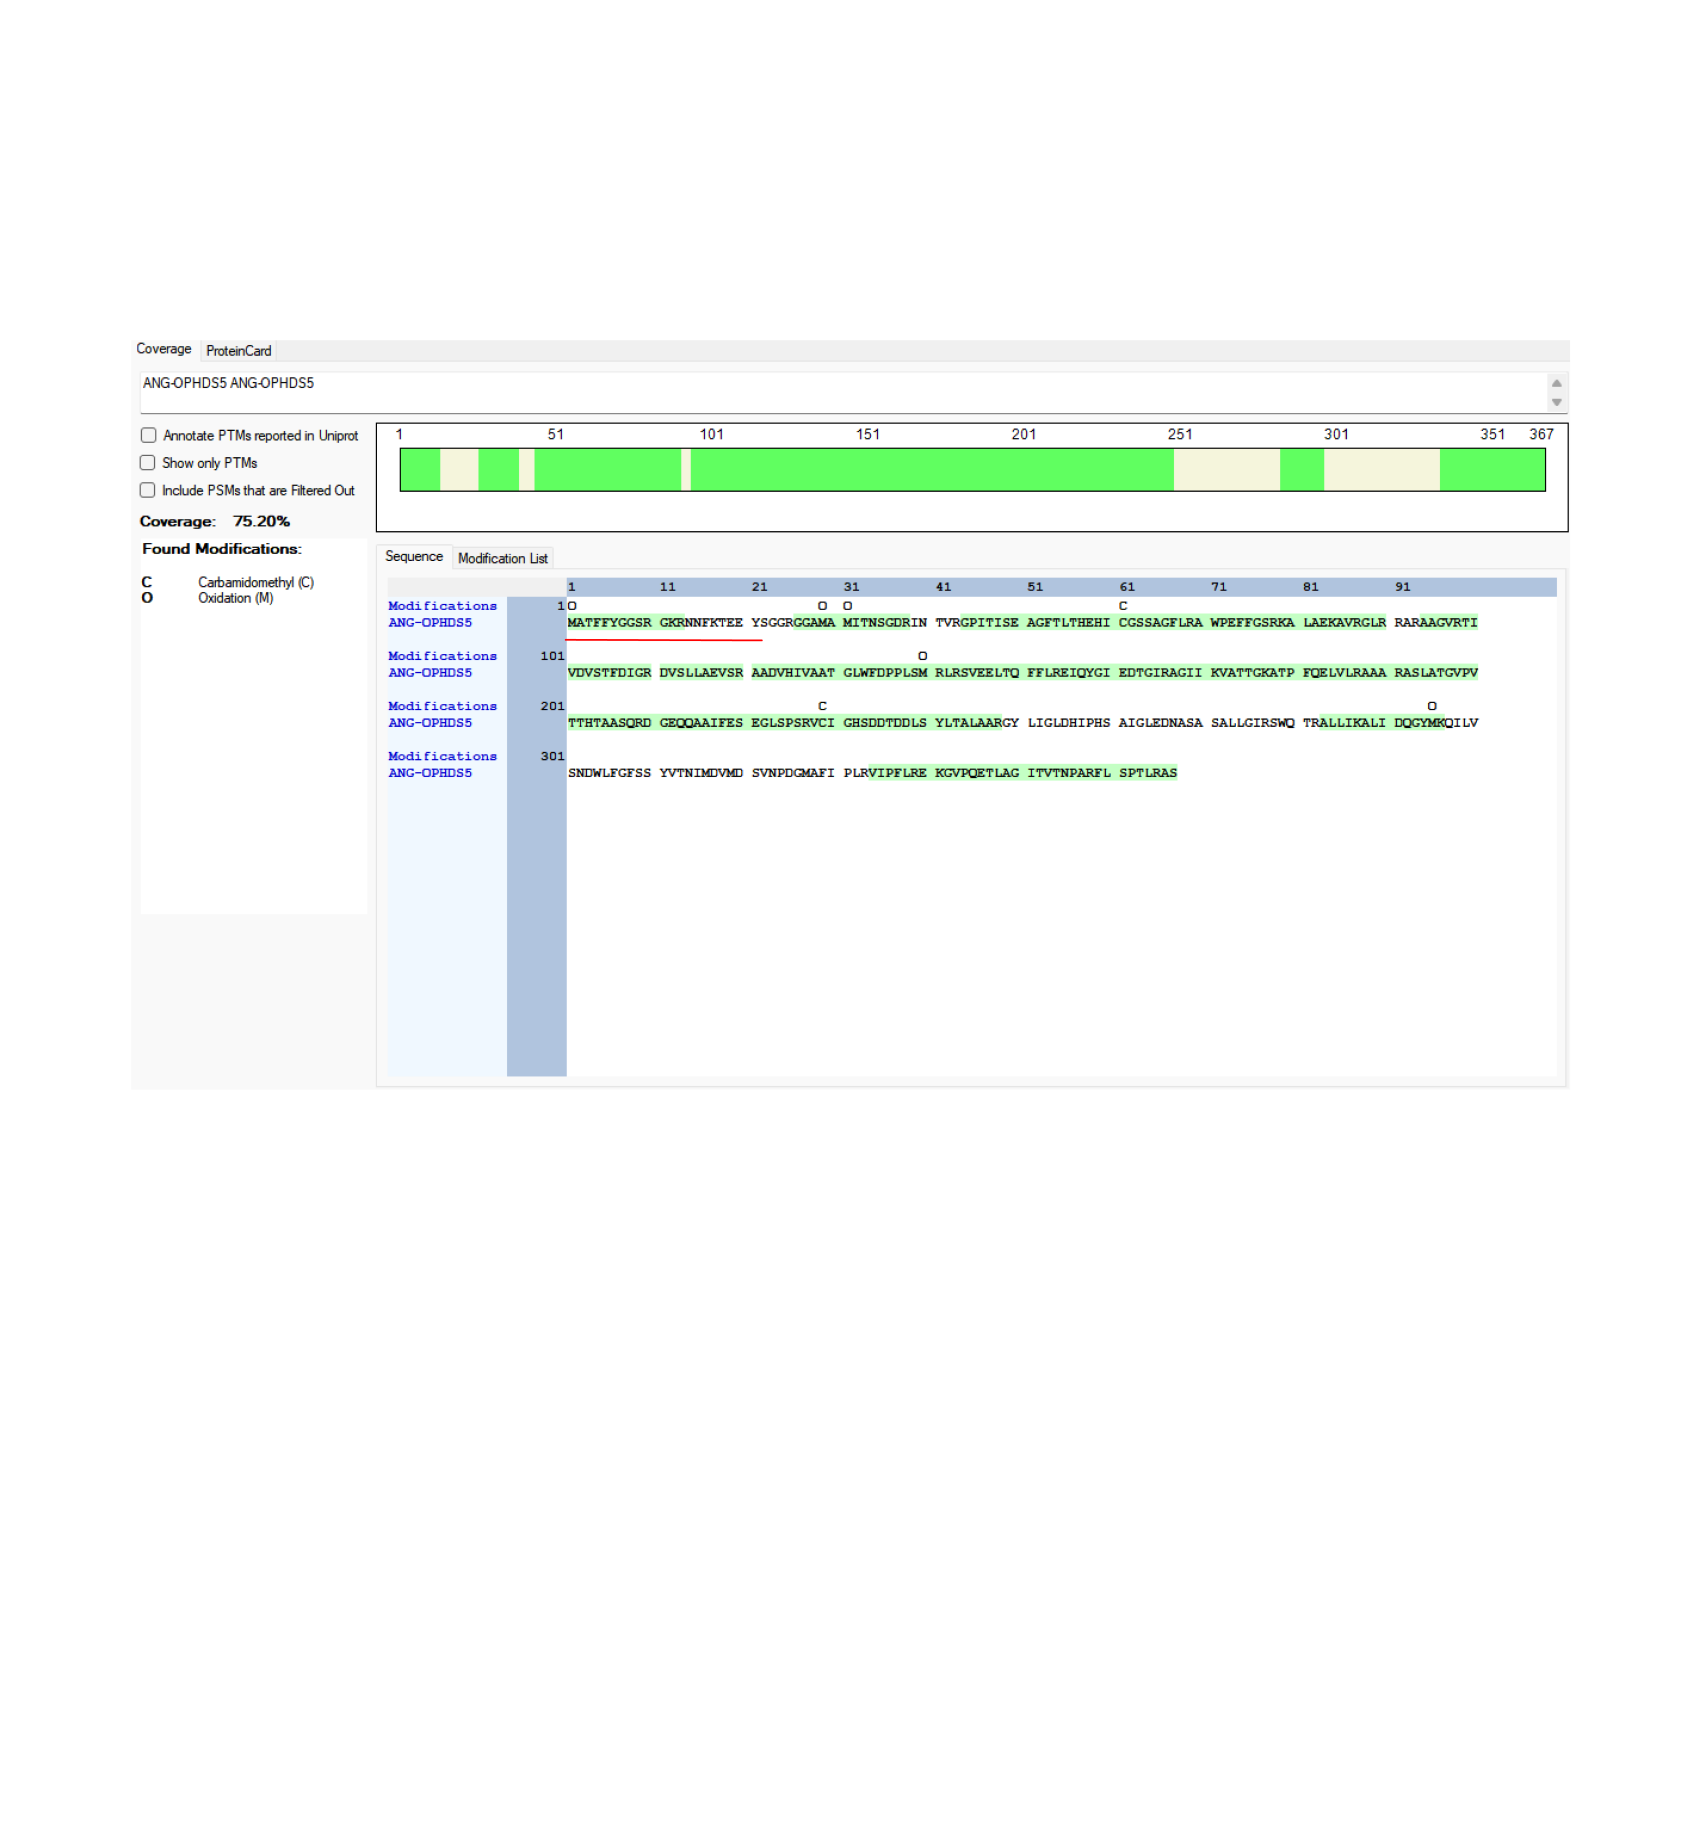


**Fig.S2. Amino acid sequence coverage map of ANG-OPHDS5 from qualitative proteomics analysis using HPLC-MS/MS.**

**
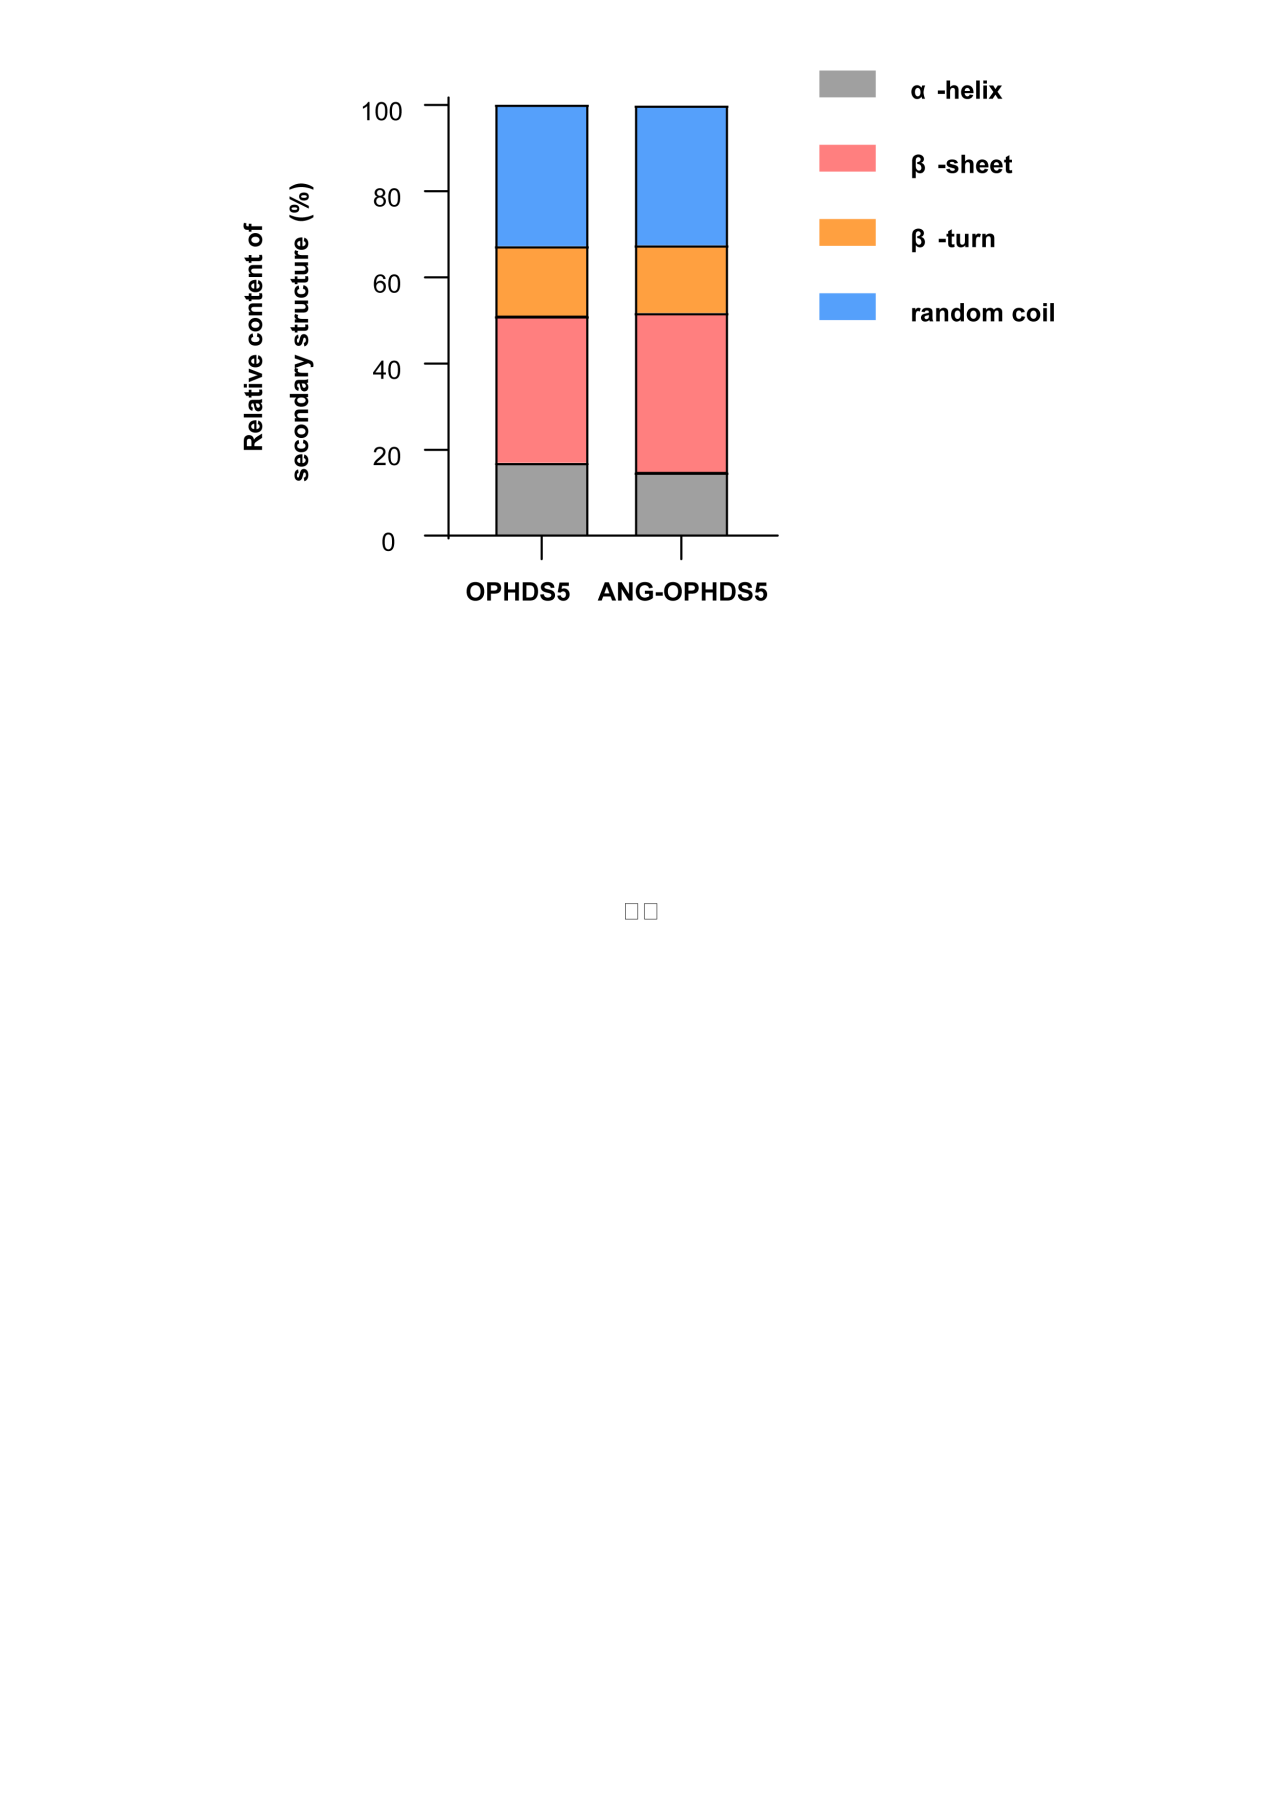
**

**Fig.S3. Secondary‑structure composition of OPHDS5 and ANG‑OPHDS5.**

Table S1 The coding gene sequences encoding six distinct fusion proteins.

| Recombinant fusion protein | Gene sequence |
| --- | --- |
| ANG-OPHDS5 | ATGGCCACATTTTTCTATGGTGGATCAAGGGGGAAACGCAATAACTTCAAGACCGAAGAGTACAGCGGTGGCCGTGGTGGCGCCATGGCCATGATAACAAATAGCGGTGATCGTATTAACACCGTTCGCGGTCCGATTACTATCAGCGAAGCGGGCTTCACCCTGACTCACGAGCACATCTGTGGCAGCTCAGCGGGCTTCCTCCGCGCGTGGCCTGAGTTCTTCGGCAGCCGTAAGGCGCTGGCGGAGAAGGCCGTTAGAGGCTTGCGCCGTGCGCGTGCAGCTGGTGTTCGTACCATTGTGGATGTGTCTACCTTTGACATCGGTCGTGATGTAAGCCTGTTGGCTGAAGTCTCGCGCGCTGCAGATGTGCATATCGTGGCAGCGACGGGCTTATGGTTTGACCCGCCACTGTCCATGCGTCTGAGAAGCGTTGAAGAACTGACCCAGTTCTTCCTGCGCGAAATCCAGTATGGTATTGAAGACACCGGTATCCGGGCCGGGATCATCAAAGTTGCAACTACCGGTAAAGCGACCCCGTTCCAAGAGCTGGTGTTGCGTGCTGCAGCACGCGCATCGCTCGCCACGGGCGTCCCGGTTACGACCCACACCGCGGCGAGTCAGCGTGACGGTGAGCAGCAGGCTGCGATTTTTGAAAGCGAGGGCTTATCCCCGAGCCGTGTTTGCATCGGTCATTCTGATGACACCGATGATCTGAGTTATCTGACCGCGCTGGCCGCGCGTGGTTACCTGATCGGCTTGGACCACATTCCACATAGCGCGATTGGCCTTGAGGACAACGCAAGCGCTTCCGCGCTGCTGGGTATCCGCAGCTGGCAGACGCGTGCGTTGCTGATCAAGGCGTTGATTGACCAAGGTTACATGAAACAAATTCTGGTTTCCAACGATTGGCTGTTTGGTTTCAGCTCGTACGTGACCAATATTATGGACGTGATGGACAGCGTCAATCCGGATGGTATGGCATTTATTCCGCTGCGTGTTATCCCGTTTCTGCGCGAGAAGGGTGTGCCGCAAGAGACATTGGCCGGCATCACCGTGACCAACCCGGCACGTTTCTTGTCCCCGACCCTGCGTGCGAGCTGA |
| OPHDS5-ANG | ATGGCCATGATAACAAATAGCGGTGATCGTATTAACACCGTTCGCGGTCCGATTACTATCAGCGAAGCGGGCTTCACCCTGACTCACGAGCACATCTGTGGCAGCTCAGCGGGCTTCCTCCGCGCGTGGCCTGAGTTCTTCGGCAGCCGTAAGGCGCTGGCGGAGAAGGCCGTTAGAGGCTTGCGCCGTGCGCGTGCAGCTGGTGTTCGTACCATTGTGGATGTGTCTACCTTTGACATCGGTCGTGATGTAAGCCTGTTGGCTGAAGTCTCGCGCGCTGCAGATGTGCATATCGTGGCAGCGACGGGCTTATGGTTTGACCCGCCACTGTCCATGCGTCTGAGAAGCGTTGAAGAACTGACCCAGTTCTTCCTGCGCGAAATCCAGTATGGTATTGAAGACACCGGTATCCGGGCCGGGATCATCAAAGTTGCAACTACCGGTAAAGCGACCCCGTTCCAAGAGCTGGTGTTGCGTGCTGCAGCACGCGCATCGCTCGCCACGGGCGTCCCGGTTACGACCCACACCGCGGCGAGTCAGCGTGACGGTGAGCAGCAGGCTGCGATTTTTGAAAGCGAGGGCTTATCCCCGAGCCGTGTTTGCATCGGTCATTCTGATGACACCGATGATCTGAGTTATCTGACCGCGCTGGCCGCGCGTGGTTACCTGATCGGCTTGGACCACATTCCACATAGCGCGATTGGCCTTGAGGACAACGCAAGCGCTTCCGCGCTGCTGGGTATCCGCAGCTGGCAGACGCGTGCGTTGCTGATCAAGGCGTTGATTGACCAAGGTTACATGAAACAAATTCTGGTTTCCAACGATTGGCTGTTTGGTTTCAGCTCGTACGTGACCAATATTATGGACGTGATGGACAGCGTCAATCCGGATGGTATGGCATTTATTCCGCTGCGTGTTATCCCGTTTCTGCGCGAGAAGGGTGTGCCGCAAGAGACATTGGCCGGCATCACCGTGACCAACCCGGCACGTTTCTTGTCCCCGACCCTGCGTGCGAGCAGCGGTGGCCGTGGTGGCACATTTTTCTATGGTGGATCAAGGGGGAAACGCAATAACTTCAAGACCGAAGAGTACTGA |
| His-ANG-OPHDS5 | ATGGGCAGCAGCCATCATCATCATCATCACAGCAGCGGCCTGGTGCCGCGCGGCAGCCATATGACATTTTTCTATGGTGGATCAAGGGGGAAACGCAATAACTTCAAGACCGAAGAGTACAGCGGTGGCCGTGGTGGCGCCATGGCCATGATAACAAATAGCGGTGATCGTATTAACACCGTTCGCGGTCCGATTACTATCAGCGAAGCGGGCTTCACCCTGACTCACGAGCACATCTGTGGCAGCTCAGCGGGCTTCCTCCGCGCGTGGCCTGAGTTCTTCGGCAGCCGTAAGGCGCTGGCGGAGAAGGCCGTTAGAGGCTTGCGCCGTGCGCGTGCAGCTGGTGTTCGTACCATTGTGGATGTGTCTACCTTTGACATCGGTCGTGATGTAAGCCTGTTGGCTGAAGTCTCGCGCGCTGCAGATGTGCATATCGTGGCAGCGACGGGCTTATGGTTTGACCCGCCACTGTCCATGCGTCTGAGAAGCGTTGAAGAACTGACCCAGTTCTTCCTGCGCGAAATCCAGTATGGTATTGAAGACACCGGTATCCGGGCCGGGATCATCAAAGTTGCAACTACCGGTAAAGCGACCCCGTTCCAAGAGCTGGTGTTGCGTGCTGCAGCACGCGCATCGCTCGCCACGGGCGTCCCGGTTACGACCCACACCGCGGCGAGTCAGCGTGACGGTGAGCAGCAGGCTGCGATTTTTGAAAGCGAGGGCTTATCCCCGAGCCGTGTTTGCATCGGTCATTCTGATGACACCGATGATCTGAGTTATCTGACCGCGCTGGCCGCGCGTGGTTACCTGATCGGCTTGGACCACATTCCACATAGCGCGATTGGCCTTGAGGACAACGCAAGCGCTTCCGCGCTGCTGGGTATCCGCAGCTGGCAGACGCGTGCGTTGCTGATCAAGGCGTTGATTGACCAAGGTTACATGAAACAAATTCTGGTTTCCAACGATTGGCTGTTTGGTTTCAGCTCGTACGTGACCAATATTATGGACGTGATGGACAGCGTCAATCCGGATGGTATGGCATTTATTCCGCTGCGTGTTATCCCGTTTCTGCGCGAGAAGGGTGTGCCGCAAGAGACATTGGCCGGCATCACCGTGACCAACCCGGCACGTTTCTTGTCCCCGACCCTGCGTGCGAGCTGA |
| ANG-OPHDS5-His | ATGGCCACATTTTTCTATGGTGGATCAAGGGGGAAACGCAATAACTTCAAGACCGAAGAGTACAGCGGTGGCCGTGGTGGCGCCATGGCCATGATAACAAATAGCGGTGATCGTATTAACACCGTTCGCGGTCCGATTACTATCAGCGAAGCGGGCTTCACCCTGACTCACGAGCACATCTGTGGCAGCTCAGCGGGCTTCCTCCGCGCGTGGCCTGAGTTCTTCGGCAGCCGTAAGGCGCTGGCGGAGAAGGCCGTTAGAGGCTTGCGCCGTGCGCGTGCAGCTGGTGTTCGTACCATTGTGGATGTGTCTACCTTTGACATCGGTCGTGATGTAAGCCTGTTGGCTGAAGTCTCGCGCGCTGCAGATGTGCATATCGTGGCAGCGACGGGCTTATGGTTTGACCCGCCACTGTCCATGCGTCTGAGAAGCGTTGAAGAACTGACCCAGTTCTTCCTGCGCGAAATCCAGTATGGTATTGAAGACACCGGTATCCGGGCCGGGATCATCAAAGTTGCAACTACCGGTAAAGCGACCCCGTTCCAAGAGCTGGTGTTGCGTGCTGCAGCACGCGCATCGCTCGCCACGGGCGTCCCGGTTACGACCCACACCGCGGCGAGTCAGCGTGACGGTGAGCAGCAGGCTGCGATTTTTGAAAGCGAGGGCTTATCCCCGAGCCGTGTTTGCATCGGTCATTCTGATGACACCGATGATCTGAGTTATCTGACCGCGCTGGCCGCGCGTGGTTACCTGATCGGCTTGGACCACATTCCACATAGCGCGATTGGCCTTGAGGACAACGCAAGCGCTTCCGCGCTGCTGGGTATCCGCAGCTGGCAGACGCGTGCGTTGCTGATCAAGGCGTTGATTGACCAAGGTTACATGAAACAAATTCTGGTTTCCAACGATTGGCTGTTTGGTTTCAGCTCGTACGTGACCAATATTATGGACGTGATGGACAGCGTCAATCCGGATGGTATGGCATTTATTCCGCTGCGTGTTATCCCGTTTCTGCGCGAGAAGGGTGTGCCGCAAGAGACATTGGCCGGCATCACCGTGACCAACCCGGCACGTTTCTTGTCCCCGACCCTGCGTGCGAGCGGCGGCAGCGGCGGCCTGGTGCCGCGCGGCAGCGGCGGCGGCGGCGGCCACCACCACCACCACCACTGA |
| His-ANG-3L-OPHDS5 | ATGGGCAGCAGCCATCATCATCATCATCACAGCAGCGGCCTGGTGCCGCGCGGCAGCCATATGACATTTTTCTATGGTGGATCAAGGGGGAAACGCAATAACTTCAAGACCGAAGAGTACGGAGGCGGTGGCTCAGGAGGTGGTGGGAGCGGTGGCGGCGGATCCATGATAACAAATAGCGGTGATCGTATTAACACCGTTCGCGGTCCGATTACTATCAGCGAAGCGGGCTTCACCCTGACTCACGAGCACATCTGTGGCAGCTCAGCGGGCTTCCTCCGCGCGTGGCCTGAGTTCTTCGGCAGCCGTAAGGCGCTGGCGGAGAAGGCCGTTAGAGGCTTGCGCCGTGCGCGTGCAGCTGGTGTTCGTACCATTGTGGATGTGTCTACCTTTGACATCGGTCGTGATGTAAGCCTGTTGGCTGAAGTCTCGCGCGCTGCAGATGTGCATATCGTGGCAGCGACGGGCTTATGGTTTGACCCGCCACTGTCCATGCGTCTGAGAAGCGTTGAAGAACTGACCCAGTTCTTCCTGCGCGAAATCCAGTATGGTATTGAAGACACCGGTATCCGGGCCGGGATCATCAAAGTTGCAACTACCGGTAAAGCGACCCCGTTCCAAGAGCTGGTGTTGCGTGCTGCAGCACGCGCATCGCTCGCCACGGGCGTCCCGGTTACGACCCACACCGCGGCGAGTCAGCGTGACGGTGAGCAGCAGGCTGCGATTTTTGAAAGCGAGGGCTTATCCCCGAGCCGTGTTTGCATCGGTCATTCTGATGACACCGATGATCTGAGTTATCTGACCGCGCTGGCCGCGCGTGGTTACCTGATCGGCTTGGACCACATTCCACATAGCGCGATTGGCCTTGAGGACAACGCAAGCGCTTCCGCGCTGCTGGGTATCCGCAGCTGGCAGACGCGTGCGTTGCTGATCAAGGCGTTGATTGACCAAGGTTACATGAAACAAATTCTGGTTTCCAACGATTGGCTGTTTGGTTTCAGCTCGTACGTGACCAATATTATGGACGTGATGGACAGCGTCAATCCGGATGGTATGGCATTTATTCCGCTGCGTGTTATCCCGTTTCTGCGCGAGAAGGGTGTGCCGCAAGAGACATTGGCCGGCATCACCGTGACCAACCCGGCACGTTTCTTGTCCCCGACCCTGCGTGCGAGCTGA |
| ANG-3L-OPHDS5-His | ATGGCCACATTTTTCTATGGTGGATCAAGGGGGAAACGCAATAACTTCAAGACCGAAGAGTACGGAGGCGGTGGCTCAGGAGGTGGTGGGAGCGGTGGCGGCGGATCCATGATAACAAATAGCGGTGATCGTATTAACACCGTTCGCGGTCCGATTACTATCAGCGAAGCGGGCTTCACCCTGACTCACGAGCACATCTGTGGCAGCTCAGCGGGCTTCCTCCGCGCGTGGCCTGAGTTCTTCGGCAGCCGTAAGGCGCTGGCGGAGAAGGCCGTTAGAGGCTTGCGCCGTGCGCGTGCAGCTGGTGTTCGTACCATTGTGGATGTGTCTACCTTTGACATCGGTCGTGATGTAAGCCTGTTGGCTGAAGTCTCGCGCGCTGCAGATGTGCATATCGTGGCAGCGACGGGCTTATGGTTTGACCCGCCACTGTCCATGCGTCTGAGAAGCGTTGAAGAACTGACCCAGTTCTTCCTGCGCGAAATCCAGTATGGTATTGAAGACACCGGTATCCGGGCCGGGATCATCAAAGTTGCAACTACCGGTAAAGCGACCCCGTTCCAAGAGCTGGTGTTGCGTGCTGCAGCACGCGCATCGCTCGCCACGGGCGTCCCGGTTACGACCCACACCGCGGCGAGTCAGCGTGACGGTGAGCAGCAGGCTGCGATTTTTGAAAGCGAGGGCTTATCCCCGAGCCGTGTTTGCATCGGTCATTCTGATGACACCGATGATCTGAGTTATCTGACCGCGCTGGCCGCGCGTGGTTACCTGATCGGCTTGGACCACATTCCACATAGCGCGATTGGCCTTGAGGACAACGCAAGCGCTTCCGCGCTGCTGGGTATCCGCAGCTGGCAGACGCGTGCGTTGCTGATCAAGGCGTTGATTGACCAAGGTTACATGAAACAAATTCTGGTTTCCAACGATTGGCTGTTTGGTTTCAGCTCGTACGTGACCAATATTATGGACGTGATGGACAGCGTCAATCCGGATGGTATGGCATTTATTCCGCTGCGTGTTATCCCGTTTCTGCGCGAGAAGGGTGTGCCGCAAGAGACATTGGCCGGCATCACCGTGACCAACCCGGCACGTTTCTTGTCCCCGACCCTGCGTGCGAGCGGCGGCAGCGGCGGCCTGGTGCCGCGCGGCAGCGGCGGCGGCGGCGGCCACCACCACCACCACCACTGA |

Table S2 Animal Poisoning Symptom Score.

| Poisoning  symptom score | Symptom |
| --- | --- |
| 1 | Salivation、Piloerection |
| 2 | Tremor、Dyspnea |
| 3 | Convulsion、Hypoactivity |
